# Supplementary material for: Lipase Catalyzed Transesterification of Model Long-Chain Molecules in Double-Shell Cellulose-Coated Oil-in-Water Emulsion Particles as Microbioreactors
Source: MDPI journal article supplement (doi:10.3390/ijms232012122), 2022-10-12
Supplement: s1 [file s1]

## Article

# Lipase Catalyzed Transesterification of Model Long-Chain Molecules in Double-Shell Cellulose-Coated Oil-in-Water Emulsion Particles as Microbioreactors

Itzhak Meir <sup>1,†</sup>, Gilad Alfassi <sup>2,†</sup>, Yael Arazi <sup>3</sup>, Dmitry M. Rein <sup>1</sup>, Ayelet Fishman <sup>3</sup> and Yachin Cohen <sup>1,\*</sup>

<sup>1</sup> Department of Chemical Engineering, Technion—Israel Institute of Technology, Haifa 3200003, Israel

<sup>2</sup> Department of Biotechnology Engineering, Braude College of Engineering, Karmiel 2161002, Israel

<sup>3</sup> Department of Biotechnology and Food Engineering, Technion—Israel Institute of Technology, Haifa 3200003, Israel

\* Correspondence: yachinc@technion.ac.il

† These authors contributed equally to this work.

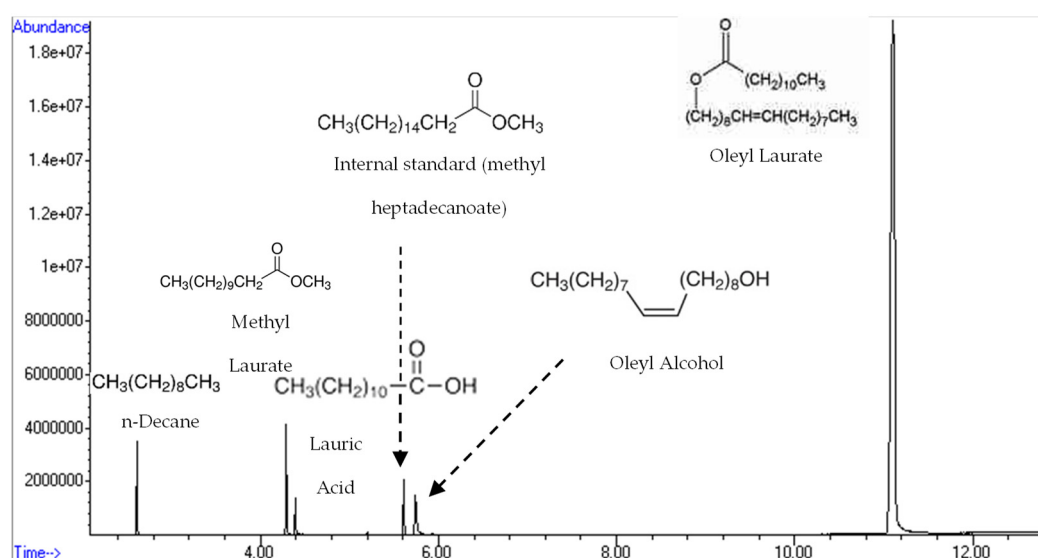

**Figure S1.** GC-MS chromatogram of a mixture containing (from left to right): decane, methyl laureate, lauric acid, internal standard (methyl heptadecanoate), oleyl alcohol and oleyl laureate.

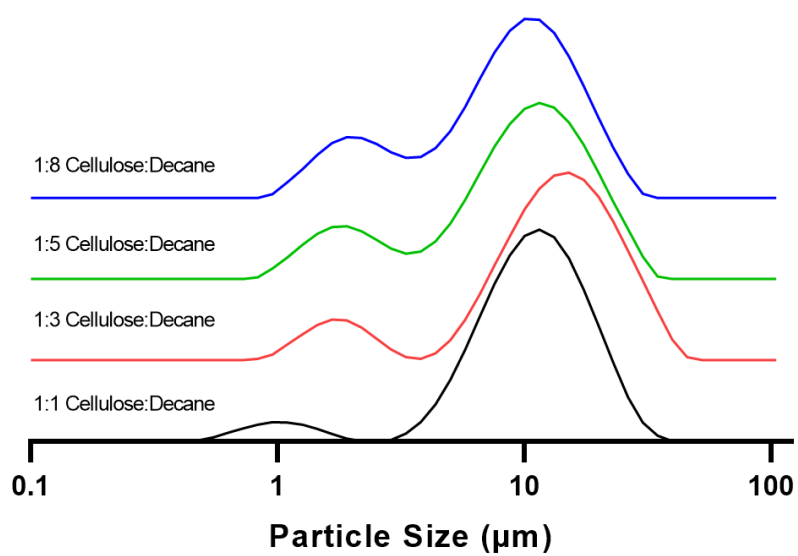

**Figure S2.** Particle size distribution of emulsified n-decane with cellulose hydrogel at 1:1, 1:3, 1:5, 1:8 cellulose:oil ration, determined by light scattering.
